# Supplementary material
Source: PubMed Central journal article supplement (PMC5331757)

Fig. 2

TT gel  
Blot: 2D8

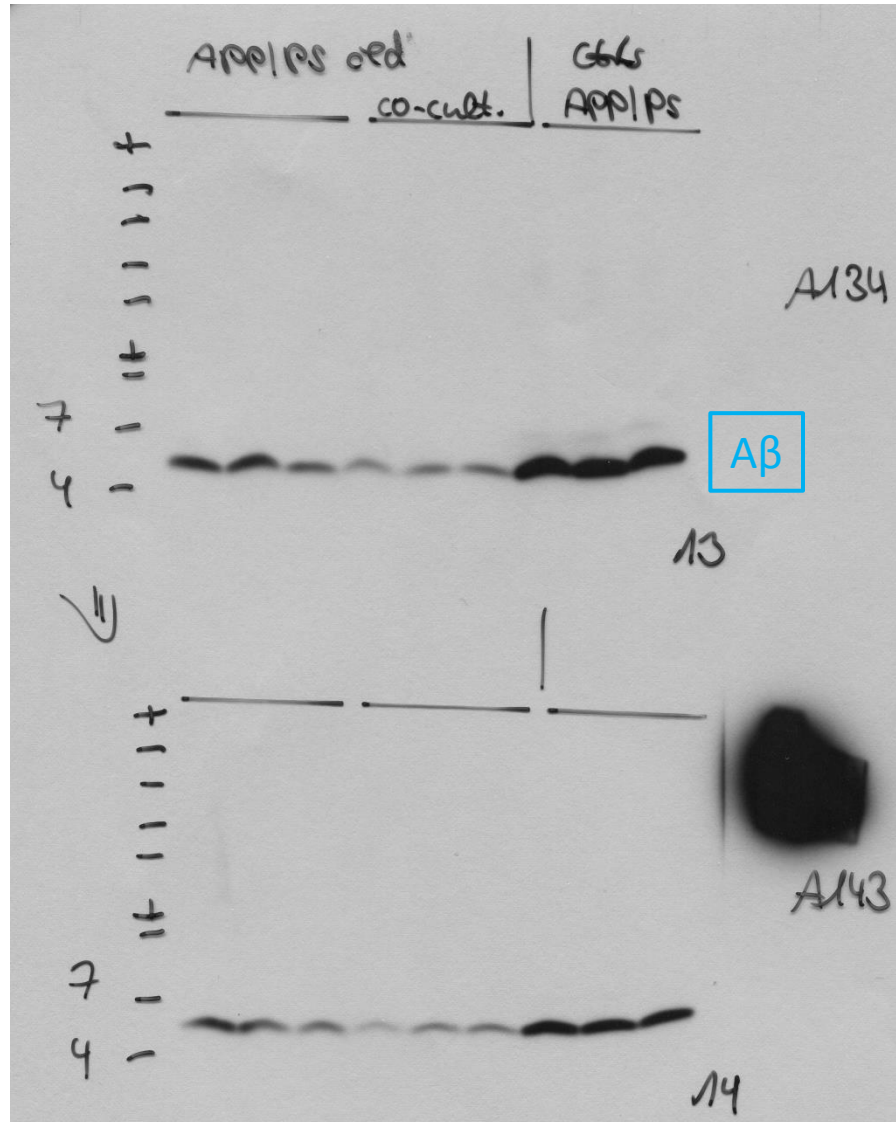

Supplement: EMBJ-36-583-s003.pdf [file EMBJ-36-583-s003.pdf]
